# Supplementary material for: Understanding and controlling the depth sensitivity of scanning probe based infrared imaging and nanospectroscopy for buried polymeric structures
Source: Royal Society of Chemistry journal article supplement (doi:10.1039/d3nr01657a), 2023-01-01
Supplement: d3nr01657a1.pdf [file d3nr01657a1.pdf]

SUPPORTING INFORMATION

# Understanding and Controlling the Depth Sensitivity of Infrared Imaging and Nanospectroscopy for Bilayer Polymeric Thin Films

*Nathaniel Prine, Camille Cardinal, Xiaodan Gu\**

*School of Polymer Science and Engineering, Center for Optoelectronic Materials and Devices,  
The University of Southern Mississippi, Hattiesburg, MS 39406, USA.*

Corresponding author

Correspondence to: Xiaodan Gu. *E-mail: xiaodan.gu@usm.edu*

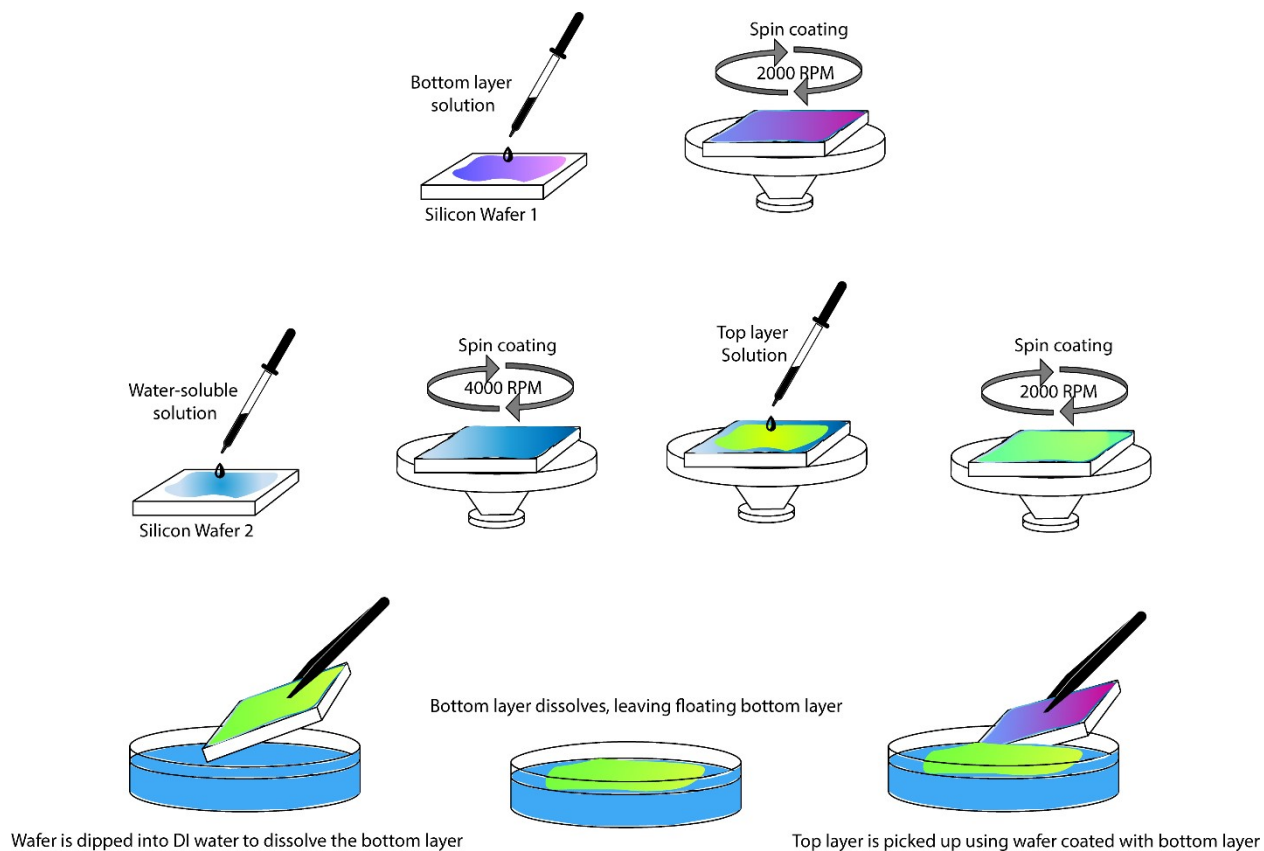

**Figure S1.** Complete sample preparation process for bilayer samples.

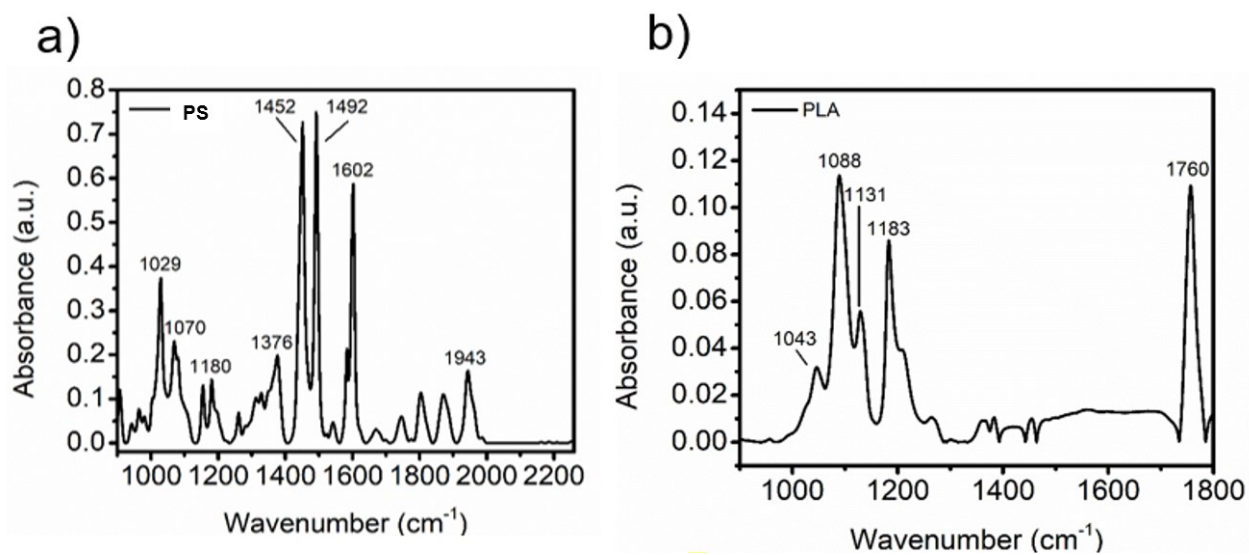

**Figure S2.** Bulk FTIR spectra of (a) PS and (b) PLA.

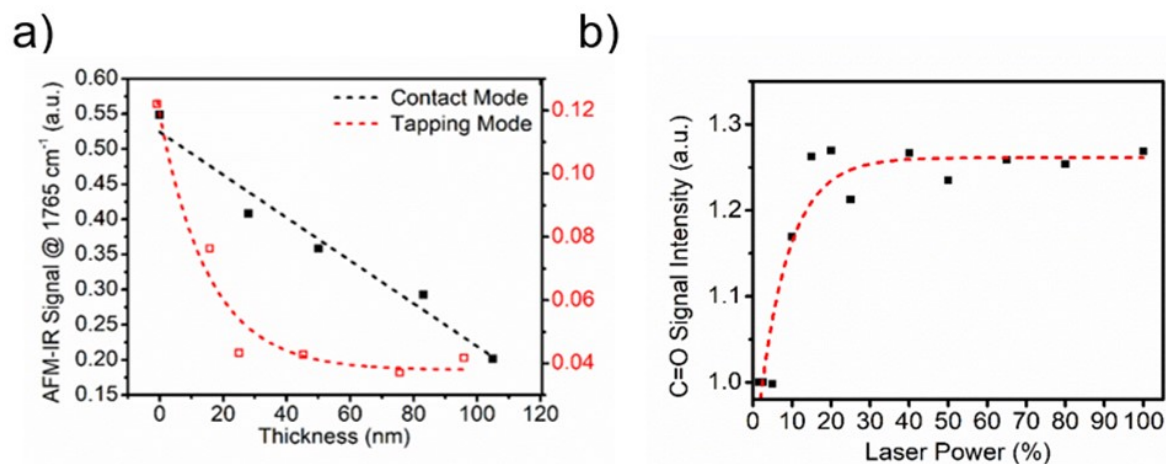

**Figure S3.** (a) Difference in AFM-IR signal acquired at 1765 cm<sup>-1</sup> using both contact mode and tapping mode. (b) AFM-IR signal intensity at 1765 cm<sup>-1</sup> as a function of laser power used.

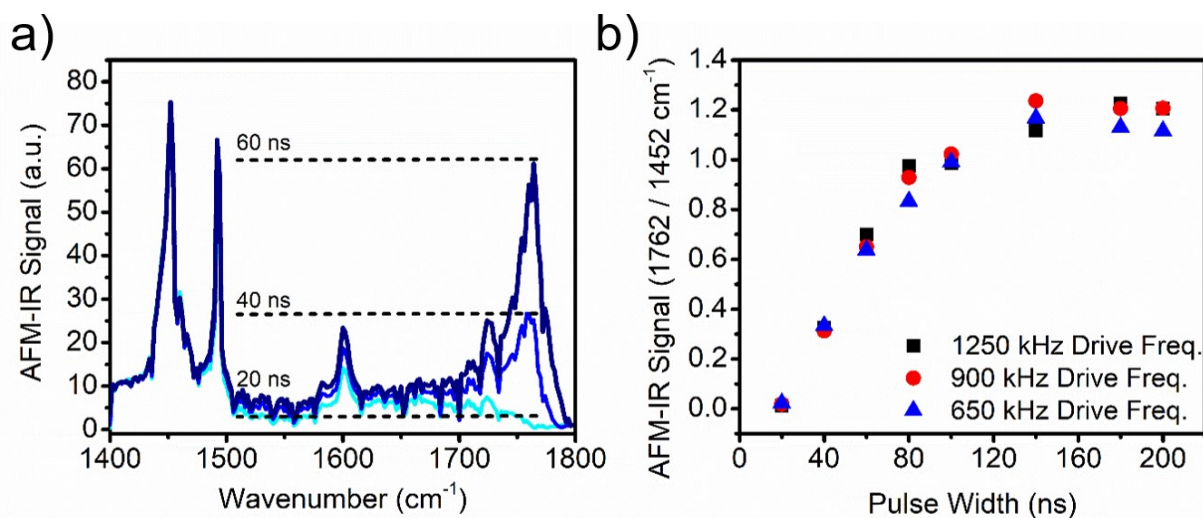

**Figure S4.** (a) AFM-IR spectra acquired on a PS/PLA bilayer sample using a 20, 40, and 60 ns pulse width. (b) The AFM-IR Signal ratio of the PLA/PS signal as a function of laser pulse width (acquired in tapping mode).
